# Supplementary material for: The prognostic value of cortical stimulation induced seizures using stereo EEG in presurgical evaluation of focal epilepsies
Source: Springer Nature journal article supplement (doi:10.1038/s41598-025-92241-z), 2025-03-07
Supplement: MOESM2 [file 41598_2025_92241_MOESM2_ESM.pdf]

## Supplementary Information

**Table S1:** Fixed effects in the model with the outcome variable SOZ

|                                | Coefficient | SE    | CI               | z     | p-value           |
|--------------------------------|-------------|-------|------------------|-------|-------------------|
| SOZ of SIS                     | .613        | .462  | [-.293 - 1.520]  | 1.33  | 0.185             |
| Identical onset pattern of SIS | 1.073       | .467  | [-.158 - 1.990]  | 2.30  | <b>0.022</b>      |
| Identical semiology of SIS     | .194        | .431  | [-.651 - 1.038]  | 0.45  | 0.653             |
| SIS inducing electrodes        | 1.434       | .374  | [-.701 - 2.166]  | 3.83  | <b>&lt; 0.001</b> |
| LVFA at onset of SIS           | 2.567       | .551  | [1.486 - 3.647]  | 4.66  | <b>&lt; 0.001</b> |
| Engel outcome 1                | -.513       | .482  | [-1.457 - .431]  | -1.06 | 0.287             |
| Lesional epilepsy              | -.614       | .536  | [-1.664 - .435]  | -1.15 | 0.251             |
| Temporal lobe epilepsy         | -.181       | 1.074 | [-2.286 - 1.924] | -0.17 | 0.866             |
| Extratemporal epilepsy         | -.744       | 1.165 | [-3.027 - 1.540] | -0.64 | 0.523             |
| Left hemispheric epilepsy      | -.117       | .581  | [-1.256 - 1.022] | -0.20 | 0.841             |
| Epilepsy onset (years)         | -.021       | .581  | [-.096 - .054]   | -0.55 | 0.584             |
| Duration of epilepsy (years)   | -.029       | .0263 | [-.080 - .023]   | -1.10 | 0.272             |
| Female                         | .590        | .465  | [-.321 - 1.501]  | 1.27  | 0.204             |

Values are SE standard error, CI 95% confidence interval, SOZ seizure onset zone, SIS stimulation-induced seizures, LVFA low voltage fast activity

## Supplementary figure legend

**Figure S1:** Classification of stimulation seizure patterns according to Lagarde et al. into 8 different patterns (A: LVFA, B: preictal spiking followed by LVFA, C: burst of polyspikes followed by LVFA, D: slow wave or baseline shift followed by LVFA, E: rhythmic spikes or spike-waves, F: sharp theta/alpha activity, G: sharp beta activity, H: delta and fast activity). Invasive EEG is depicted with High-pass filter: 0.3Hz, Low-pass filter: 1000Hz, Gain: 800 $\mu$ V/cm, Notch-filter on. [A, E, F, G and H depict stimulation-induced seizures; B, C and D show spontaneous seizures.]
